# Supplementary material
Source: publisher figshare collection journal article supplement (https://acs.figshare.com/ndownloader/files/5161054)
Supplement: Supplementary file 1 [file 5161054]

 
data_a 
 
_audit_creation_method            SHELXL-97 
_chemical_name_systematic 
; 
 ? 
; 
_chemical_name_common             ? 
_chemical_melting_point           ? 
_chemical_formula_moiety          ? 
_chemical_formula_sum 
 'C30 H18 N4 O6' 
_chemical_formula_weight          530.48 
 
loop_ 
 _atom_type_symbol 
 _atom_type_description 
 _atom_type_scat_dispersion_real 
 _atom_type_scat_dispersion_imag 
 _atom_type_scat_source 
 'C'  'C'   0.0033   0.0016 
 'International Tables Vol C Tables 4.2.6.8 and 6.1.1.4' 
 'H'  'H'   0.0000   0.0000 
 'International Tables Vol C Tables 4.2.6.8 and 6.1.1.4' 
 'N'  'N'   0.0061   0.0033 
 'International Tables Vol C Tables 4.2.6.8 and 6.1.1.4' 
 'O'  'O'   0.0106   0.0060 
 'International Tables Vol C Tables 4.2.6.8 and 6.1.1.4' 
 
_symmetry_cell_setting            'Orthorhombic' 
_symmetry_space_group_name_H-M    'Pbcn' 
 
loop_ 
 _symmetry_equiv_pos_as_xyz 
 'x, y, z' 
 '-x+1/2, -y+1/2, z+1/2' 
 '-x, y, -z+1/2' 
 'x+1/2, -y+1/2, -z' 
 '-x, -y, -z' 
 'x-1/2, y-1/2, -z-1/2' 
 'x, -y, z-1/2' 
 '-x-1/2, y-1/2, z' 
 
_cell_length_a                    15.195(3) 
_cell_length_b                    12.410(3) 
_cell_length_c                    12.884(3) 
_cell_angle_alpha                 90.00 
_cell_angle_beta                  90.00 
_cell_angle_gamma                 90.00 
_cell_volume                      2429.7(8) 
_cell_formula_units_Z             4 
_cell_measurement_temperature     293(2) 
_cell_measurement_reflns_used     12502 
_cell_measurement_theta_min       2.64 
_cell_measurement_theta_max       25.03 
 
_exptl_crystal_description        'Block' 
_exptl_crystal_colour             ? 
_exptl_crystal_size_max           0.25 
_exptl_crystal_size_mid           0.20 
_exptl_crystal_size_min           0.08 
_exptl_crystal_density_meas       ? 
_exptl_crystal_density_diffrn     1.450 
_exptl_crystal_density_method     'not measured' 
_exptl_crystal_F_000              1096 
_exptl_absorpt_coefficient_mu     0.104 
_exptl_absorpt_correction_type    'Empirical' 
_exptl_absorpt_correction_T_min   0.974 
_exptl_absorpt_correction_T_max   0.992 
 
_exptl_special_details 
; 
ABSCOR by T.Higashi    8 March, 1995
; 
 
_diffrn_ambient_temperature       293(2) 
_diffrn_radiation_wavelength      0.71073 
_diffrn_radiation_type            MoK\a 
_diffrn_radiation_source          'fine-focus sealed tube' 
_diffrn_radiation_monochromator   graphite 
_diffrn_measurement_device_type   'Rigaku RAXIS RAPID IP' 
_diffrn_measurement_method        'Oscillation' 
_diffrn_detector_area_resol_mean  '100x100 microns' 
_diffrn_standards_number          ? 
_diffrn_standards_interval_count  ? 
_diffrn_standards_interval_time   ? 
_diffrn_standards_decay_%         ? 
_diffrn_reflns_number             12502 
_diffrn_reflns_av_R_equivalents   0.0376 
_diffrn_reflns_av_sigmaI/netI     0.0796 
_diffrn_reflns_limit_h_min        -18 
_diffrn_reflns_limit_h_max        18 
_diffrn_reflns_limit_k_min        -14 
_diffrn_reflns_limit_k_max        14 
_diffrn_reflns_limit_l_min        -15 
_diffrn_reflns_limit_l_max        15 
_diffrn_reflns_theta_min          2.64 
_diffrn_reflns_theta_max          25.03 
_reflns_number_total              2141 
_reflns_number_gt                 986 
_reflns_threshold_expression      >2sigma(I) 
 
_computing_data_collection
;
                                   Molecular Structure Corporation (1994)
                                   MSC/AFC Diffractometer Control Software
                                   SC, 3200 Research Forest Drive, The
                                   Woodlands, TX 77381, USA.
;
_computing_cell_refinement
;
                                   Molecular Structure Corporation (1994)
                                   MSC/AFC Diffractometer Control Software
                                   MSC, 3200 Research Forest Drive, The
                                   Woodlands, TX 77381 USA.
;
_computing_data_reduction
;
                                   Sheldrick, G. M. (1998) SHELXS98, Program
                                   for the Solution of Crystal Structure,
                                   University of Gottingen, Germany.
;
_computing_structure_solution
;
                                   Sheldrick, G. M. (1998) SHELXS98, Program
                                   for the Solution of Crystal Structure,
                                   University of Gottingen, Germany.
;
_computing_structure_refinement
;
                                   Sheldrick, G. M. (1998) SHELXL98, Program
                                   for the Refinement of Crystal Structure,
                                   University of Gottingen, Germany.
;
_computing_molecular_graphics
;
                                   Interactive Molecular Graphics XP, Virsion
                                   4.2 for MSDOS (1990), Siemens Analytical
                                   X-ray Instruments Inc., Madison, Wisconsin,
                                   USA.
;
_computing_publication_material
;
                                   Sheldrick, G. M. (1998) SHELXL98, Program
                                   for the refinement of Crystal Structure,
                                   University of Gottingen, Germany.
;
 
_refine_special_details 
; 
 Refinement of F^2^ against ALL reflections.  The weighted R-factor wR and 
 goodness of fit S are based on F^2^, conventional R-factors R are based 
 on F, with F set to zero for negative F^2^. The threshold expression of 
 F^2^ > 2sigma(F^2^) is used only for calculating R-factors(gt) etc. and is 
 not relevant to the choice of reflections for refinement.  R-factors based 
 on F^2^ are statistically about twice as large as those based on F, and R- 
 factors based on ALL data will be even larger. 
; 
 
_refine_ls_structure_factor_coef  Fsqd  
_refine_ls_matrix_type            full 
_refine_ls_weighting_scheme       calc  
_refine_ls_weighting_details 
 'calc w=1/[\s^2^(Fo^2^)+(0.0107P)^2^+0.0000P] where P=(Fo^2^+2Fc^2^)/3' 
_atom_sites_solution_primary      direct 
_atom_sites_solution_secondary    difmap 
_atom_sites_solution_hydrogens
;
                                  hydrogen atoms are generated by HFIX
                                  instructions
;
_refine_ls_hydrogen_treatment
;
                                  hydrogen coordinates ride on the coordinates
                                  of the previous atom, the isotropic U values
                                  are 1.2 OR 1.5 time over the U values of the
                                  previous atom.
;
_refine_ls_extinction_method      SHELXL 
_refine_ls_extinction_coef        0.00102(11) 
_refine_ls_extinction_expression 
 'Fc^*^=kFc[1+0.001xFc^2^\l^3^/sin(2\q)]^-1/4^' 
_refine_ls_number_reflns          2141 
_refine_ls_number_parameters      184 
_refine_ls_number_restraints      0 
_refine_ls_R_factor_all           0.0944 
_refine_ls_R_factor_gt            0.0372 
_refine_ls_wR_factor_ref          0.0531 
_refine_ls_wR_factor_gt           0.0494 
_refine_ls_goodness_of_fit_ref    0.937 
_refine_ls_restrained_S_all       0.937 
_refine_ls_shift/su_max           0.000 
_refine_ls_shift/su_mean          0.000 
 
loop_ 
 _atom_site_label 
 _atom_site_type_symbol 
 _atom_site_fract_x 
 _atom_site_fract_y 
 _atom_site_fract_z 
 _atom_site_U_iso_or_equiv 
 _atom_site_adp_type 
 _atom_site_occupancy 
 _atom_site_symmetry_multiplicity 
 _atom_site_calc_flag 
 _atom_site_refinement_flags 
 _atom_site_disorder_assembly 
 _atom_site_disorder_group 
O1 O 0.32574(10) 0.15093(12) 0.45520(12) 0.0685(5) Uani 1 1 d . . . 
O2 O 0.12369(11) -0.09875(12) 0.54628(12) 0.0762(6) Uani 1 1 d . . . 
O3 O -0.14610(10) 0.81861(13) 0.70855(13) 0.0709(6) Uani 1 1 d . . . 
N1 N 0.0000 0.33401(19) 0.7500 0.0444(7) Uani 1 2 d S . . 
N2 N 0.21040(12) 0.04935(16) 0.51531(13) 0.0476(5) Uani 1 1 d . . . 
N3 N 0.0000 0.7867(2) 0.7500 0.0465(7) Uani 1 2 d S . . 
C1 C 0.05677(14) 0.27144(16) 0.68389(18) 0.0387(6) Uani 1 1 d . . . 
C2 C 0.14632(14) 0.26468(17) 0.70264(16) 0.0516(7) Uani 1 1 d . . . 
H2 H 0.1723 0.3079 0.7530 0.062 Uiso 1 1 calc R . . 
C3 C 0.19729(14) 0.19276(17) 0.64558(17) 0.0524(7) Uani 1 1 d . . . 
H3 H 0.2573 0.1872 0.6590 0.063 Uiso 1 1 calc R . . 
C4 C 0.15993(15) 0.12997(18) 0.56965(17) 0.0445(6) Uani 1 1 d . . . 
C5 C 0.07139(14) 0.14125(17) 0.54755(16) 0.0470(7) Uani 1 1 d . . . 
H5 H 0.0461 0.1010 0.4945 0.056 Uiso 1 1 calc R . . 
C6 C 0.02044(14) 0.21217(16) 0.60409(17) 0.0454(6) Uani 1 1 d . . . 
H6 H -0.0389 0.2201 0.5882 0.055 Uiso 1 1 calc R . . 
C7 C 0.28721(17) 0.0656(2) 0.46099(18) 0.0551(7) Uani 1 1 d . . . 
C8 C 0.31186(16) -0.03681(19) 0.41332(18) 0.0634(8) Uani 1 1 d . . . 
H8 H 0.3604 -0.0483 0.3707 0.076 Uiso 1 1 calc R . . 
C9 C 0.25471(17) -0.10880(19) 0.44044(17) 0.0608(7) Uani 1 1 d . . . 
H9 H 0.2558 -0.1810 0.4212 0.073 Uiso 1 1 calc R . . 
C10 C 0.18728(16) -0.0575(2) 0.50722(19) 0.0546(7) Uani 1 1 d . . . 
C11 C 0.0000 0.4460(2) 0.7500 0.0379(8) Uani 1 2 d S . . 
C12 C 0.04239(12) 0.50297(16) 0.67139(16) 0.0439(6) Uani 1 1 d . . . 
H12 H 0.0712 0.4661 0.6186 0.053 Uiso 1 1 calc R . . 
C13 C 0.04151(13) 0.61534(16) 0.67203(16) 0.0449(6) Uani 1 1 d . . . 
H13 H 0.0694 0.6530 0.6190 0.054 Uiso 1 1 calc R . . 
C14 C 0.0000 0.6712(2) 0.7500 0.0405(9) Uani 1 2 d S . . 
C15 C -0.07366(17) 0.85063(18) 0.72940(19) 0.0528(7) Uani 1 1 d . . . 
C16 C -0.04246(12) 0.96385(13) 0.7391(2) 0.0586(8) Uani 1 1 d . . . 
H16 H -0.0773 1.0249 0.7310 0.070 Uiso 1 1 calc R . . 
 
loop_ 
 _atom_site_aniso_label 
 _atom_site_aniso_U_11 
 _atom_site_aniso_U_22 
 _atom_site_aniso_U_33 
 _atom_site_aniso_U_23 
 _atom_site_aniso_U_13 
 _atom_site_aniso_U_12 
O1 0.0635(13) 0.0629(11) 0.0791(13) 0.0021(11) 0.0090(11) -0.0059(11) 
O2 0.0731(14) 0.0654(12) 0.0901(14) -0.0172(11) 0.0168(11) -0.0091(11) 
O3 0.0524(11) 0.0723(13) 0.0879(14) 0.0072(10) 0.0008(11) 0.0050(10) 
N1 0.0474(18) 0.0319(16) 0.0540(19) 0.000 0.0146(17) 0.000 
N2 0.0430(13) 0.0412(13) 0.0585(13) -0.0083(11) 0.0136(11) -0.0035(12) 
N3 0.0383(17) 0.0335(16) 0.068(2) 0.000 0.0042(18) 0.000 
C1 0.0401(16) 0.0319(13) 0.0441(15) 0.0017(13) 0.0085(14) -0.0001(13) 
C2 0.0437(15) 0.0574(16) 0.0536(17) -0.0160(14) -0.0020(14) -0.0055(14) 
C3 0.0355(14) 0.0599(16) 0.0619(17) -0.0114(14) 0.0016(14) -0.0006(14) 
C4 0.0442(16) 0.0440(15) 0.0452(16) -0.0041(13) 0.0019(15) 0.0020(14) 
C5 0.0461(16) 0.0472(16) 0.0477(16) -0.0084(13) -0.0022(14) -0.0003(14) 
C6 0.0385(15) 0.0454(14) 0.0524(15) 0.0013(13) -0.0021(14) 0.0058(13) 
C7 0.0552(18) 0.0511(18) 0.0589(17) 0.0117(17) -0.0049(15) -0.0100(16) 
C8 0.0626(18) 0.0535(17) 0.0741(18) -0.0073(16) 0.0279(17) 0.0052(15) 
C9 0.0642(18) 0.0440(16) 0.0743(18) -0.0145(15) 0.0147(18) 0.0077(15) 
C10 0.0421(16) 0.0514(17) 0.070(2) -0.0061(16) 0.0116(15) -0.0137(16) 
C11 0.0375(19) 0.0356(18) 0.041(2) 0.000 0.0032(19) 0.000 
C12 0.0499(15) 0.0357(13) 0.0460(15) -0.0022(12) 0.0097(14) 0.0010(15) 
C13 0.0438(15) 0.0423(14) 0.0487(15) 0.0042(13) 0.0100(15) -0.0034(14) 
C14 0.045(2) 0.0292(19) 0.047(2) 0.000 0.003(2) 0.000 
C15 0.0576(17) 0.0484(15) 0.0522(17) 0.0050(14) 0.0184(17) 0.0038(15) 
C16 0.0793(19) 0.0295(11) 0.0669(17) 0.0012(15) 0.017(2) 0.0057(12) 
 
_geom_special_details 
; 
 All esds (except the esd in the dihedral angle between two l.s. planes) 
 are estimated using the full covariance matrix.  The cell esds are taken 
 into account individually in the estimation of esds in distances, angles 
 and torsion angles; correlations between esds in cell parameters are only 
 used when they are defined by crystal symmetry.  An approximate (isotropic) 
 treatment of cell esds is used for estimating esds involving l.s. planes. 
; 
 
loop_ 
 _geom_bond_atom_site_label_1 
 _geom_bond_atom_site_label_2 
 _geom_bond_distance 
 _geom_bond_site_symmetry_2 
 _geom_bond_publ_flag 
O1 C7 1.213(2) . ? 
O2 C10 1.204(2) . ? 
O3 C15 1.201(2) . ? 
N1 C11 1.390(3) . ? 
N1 C1 1.440(2) . ? 
N1 C1 1.440(2) 3_556 ? 
N2 C7 1.376(2) . ? 
N2 C10 1.376(2) . ? 
N2 C4 1.442(2) . ? 
N3 C15 1.397(2) 3_556 ? 
N3 C15 1.397(2) . ? 
N3 C14 1.434(3) . ? 
C1 C6 1.380(2) . ? 
C1 C2 1.385(2) . ? 
C2 C3 1.392(2) . ? 
C3 C4 1.374(2) . ? 
C4 C5 1.382(3) . ? 
C5 C6 1.380(2) . ? 
C7 C8 1.460(3) . ? 
C8 C9 1.294(3) . ? 
C9 C10 1.482(3) . ? 
C11 C12 1.393(2) 3_556 ? 
C11 C12 1.393(2) . ? 
C12 C13 1.395(2) . ? 
C13 C14 1.374(2) . ? 
C14 C13 1.374(2) 3_556 ? 
C15 C16 1.488(3) . ? 
C16 C16 1.321(4) 3_556 ? 
 
loop_ 
 _geom_angle_atom_site_label_1 
 _geom_angle_atom_site_label_2 
 _geom_angle_atom_site_label_3 
 _geom_angle 
 _geom_angle_site_symmetry_1 
 _geom_angle_site_symmetry_3 
 _geom_angle_publ_flag 
C11 N1 C1 122.64(12) . . ? 
C11 N1 C1 122.64(11) . 3_556 ? 
C1 N1 C1 114.7(2) . 3_556 ? 
C7 N2 C10 108.6(2) . . ? 
C7 N2 C4 126.6(2) . . ? 
C10 N2 C4 124.7(2) . . ? 
C15 N3 C15 110.8(3) 3_556 . ? 
C15 N3 C14 124.58(14) 3_556 . ? 
C15 N3 C14 124.58(14) . . ? 
C6 C1 C2 119.4(2) . . ? 
C6 C1 N1 119.27(19) . . ? 
C2 C1 N1 121.2(2) . . ? 
C1 C2 C3 119.6(2) . . ? 
C4 C3 C2 120.7(2) . . ? 
C3 C4 C5 119.4(2) . . ? 
C3 C4 N2 121.3(2) . . ? 
C5 C4 N2 119.2(2) . . ? 
C6 C5 C4 120.1(2) . . ? 
C1 C6 C5 120.6(2) . . ? 
O1 C7 N2 124.7(3) . . ? 
O1 C7 C8 127.6(3) . . ? 
N2 C7 C8 107.7(2) . . ? 
C9 C8 C7 108.4(2) . . ? 
C8 C9 C10 108.9(2) . . ? 
O2 C10 N2 125.7(2) . . ? 
O2 C10 C9 128.0(2) . . ? 
N2 C10 C9 106.4(2) . . ? 
N1 C11 C12 120.48(14) . 3_556 ? 
N1 C11 C12 120.48(14) . . ? 
C12 C11 C12 119.0(3) 3_556 . ? 
C11 C12 C13 119.9(2) . . ? 
C14 C13 C12 120.9(2) . . ? 
C13 C14 C13 119.4(3) . 3_556 ? 
C13 C14 N3 120.29(14) . . ? 
C13 C14 N3 120.29(14) 3_556 . ? 
O3 C15 N3 126.1(2) . . ? 
O3 C15 C16 128.6(2) . . ? 
N3 C15 C16 105.4(2) . . ? 
C16 C16 C15 109.21(13) 3_556 . ? 
 
loop_ 
 _geom_torsion_atom_site_label_1 
 _geom_torsion_atom_site_label_2 
 _geom_torsion_atom_site_label_3 
 _geom_torsion_atom_site_label_4 
 _geom_torsion 
 _geom_torsion_site_symmetry_1 
 _geom_torsion_site_symmetry_2 
 _geom_torsion_site_symmetry_3 
 _geom_torsion_site_symmetry_4 
 _geom_torsion_publ_flag 
C11 N1 C1 C6 -111.53(17) . . . . ? 
C1 N1 C1 C6 68.47(17) 3_556 . . . ? 
C11 N1 C1 C2 72.3(2) . . . . ? 
C1 N1 C1 C2 -107.7(2) 3_556 . . . ? 
C6 C1 C2 C3 -4.4(3) . . . . ? 
N1 C1 C2 C3 171.74(18) . . . . ? 
C1 C2 C3 C4 1.2(3) . . . . ? 
C2 C3 C4 C5 2.2(3) . . . . ? 
C2 C3 C4 N2 -175.24(19) . . . . ? 
C7 N2 C4 C3 -56.2(3) . . . . ? 
C10 N2 C4 C3 125.8(2) . . . . ? 
C7 N2 C4 C5 126.3(2) . . . . ? 
C10 N2 C4 C5 -51.7(3) . . . . ? 
C3 C4 C5 C6 -2.4(3) . . . . ? 
N2 C4 C5 C6 175.09(17) . . . . ? 
C2 C1 C6 C5 4.3(3) . . . . ? 
N1 C1 C6 C5 -171.98(18) . . . . ? 
C4 C5 C6 C1 -0.8(3) . . . . ? 
C10 N2 C7 O1 -178.2(2) . . . . ? 
C4 N2 C7 O1 3.5(4) . . . . ? 
C10 N2 C7 C8 1.9(3) . . . . ? 
C4 N2 C7 C8 -176.4(2) . . . . ? 
O1 C7 C8 C9 178.4(3) . . . . ? 
N2 C7 C8 C9 -1.7(3) . . . . ? 
C7 C8 C9 C10 0.8(3) . . . . ? 
C7 N2 C10 O2 179.5(2) . . . . ? 
C4 N2 C10 O2 -2.1(4) . . . . ? 
C7 N2 C10 C9 -1.4(3) . . . . ? 
C4 N2 C10 C9 176.89(18) . . . . ? 
C8 C9 C10 O2 179.3(3) . . . . ? 
C8 C9 C10 N2 0.3(3) . . . . ? 
C1 N1 C11 C12 -167.09(15) . . . 3_556 ? 
C1 N1 C11 C12 12.91(15) 3_556 . . 3_556 ? 
C1 N1 C11 C12 12.91(15) . . . . ? 
C1 N1 C11 C12 -167.09(15) 3_556 . . . ? 
N1 C11 C12 C13 179.67(14) . . . . ? 
C12 C11 C12 C13 -0.33(14) 3_556 . . . ? 
C11 C12 C13 C14 0.7(3) . . . . ? 
C12 C13 C14 C13 -0.33(15) . . . 3_556 ? 
C12 C13 C14 N3 179.67(15) . . . . ? 
C15 N3 C14 C13 -71.22(16) 3_556 . . . ? 
C15 N3 C14 C13 108.78(16) . . . . ? 
C15 N3 C14 C13 108.78(16) 3_556 . . 3_556 ? 
C15 N3 C14 C13 -71.22(16) . . . 3_556 ? 
C15 N3 C15 O3 179.6(3) 3_556 . . . ? 
C14 N3 C15 O3 -0.4(3) . . . . ? 
C15 N3 C15 C16 -0.48(13) 3_556 . . . ? 
C14 N3 C15 C16 179.52(13) . . . . ? 
O3 C15 C16 C16 -178.7(3) . . . 3_556 ? 
N3 C15 C16 C16 1.4(4) . . . 3_556 ? 
 
_diffrn_measured_fraction_theta_max    0.997 
_diffrn_reflns_theta_full              25.03 
_diffrn_measured_fraction_theta_full   0.997 
_refine_diff_density_max    0.176 
_refine_diff_density_min   -0.150 
_refine_diff_density_rms    0.031 
